# Supplementary material for: Growth hormone — past, present and future
Source: Springer Nature journal article supplement (doi:10.1038/nrendo.2018.22), 2018-03-16
Supplement: 41574_2018_BFnrendo201822_MOESM37_ESM.pdf [file 41574_2018_BFnrendo201822_MOESM37_ESM.pdf]

**Supplementary Table S1. Genes associated with disorders of the GH-IGF axis**

| GENES                                                                                                               | INHER   | CLINICAL FEATURES                                                                           | REFS  |
|---------------------------------------------------------------------------------------------------------------------|---------|---------------------------------------------------------------------------------------------|-------|
| <b>Growth hormone deficiency and potential for combined pituitary hormone deficiency (Secondary IGF-deficiency)</b> |         |                                                                                             |       |
| <i>FGF8</i>                                                                                                         | AR      | Holoprosencephaly, septo-optic dysplasia, hypogonadism                                      | 1     |
| <i>FGFR1</i>                                                                                                        | AD      | Hypoplasia pituitary, corpus callosum, ocular defects, hypogonadism.                        | 2     |
| <i>GLI2</i>                                                                                                         | AD      | Holoprosencephaly, single central incisor, partial agenesis corpus callosum                 | 3     |
| <i>GLI3</i>                                                                                                         | AD      | Pallister-Hall S., hypothalamic hamartoma, central polydactyly                              | 4     |
| <i>GRP161</i>                                                                                                       | AR      | Pituitary stalk interruption, intellectual disability, facial + hand dysmorphism            | 5     |
| <i>HESX1</i>                                                                                                        | AR, AD  | Optic nerve hypoplasia, pituitary hypoplasia, midline abnormalities, absent corpus callosum | 6     |
| <i>HMGA2</i>                                                                                                        | AD      | Ectopic posterior pituitary                                                                 | 7     |
| <i>IGSF1</i>                                                                                                        | XLR     | Macro-orchidism, disharmonious pubertal development                                         | 8     |
| <i>LX3</i>                                                                                                          | AR      | Sensorineural hearing loss, cervical abnormalities, short stiff neck                        | 9     |
| <i>LX4</i>                                                                                                          | AD, AR  | Pituitary and cerebellar defects, abnormalities of sella turcica                            | 10    |
| <i>OTX2</i>                                                                                                         | AD      | Ocular anomalies                                                                            | 11,12 |
| <i>PITX2</i>                                                                                                        | AD      | Axenfeld-Rieger S., coloboma, glaucoma, dental and brain abnormalities                      | 13    |
| <i>POU1F1</i>                                                                                                       | AR, AD  |                                                                                             | 14    |
| <i>PROKR2</i>                                                                                                       | AD      | Variable hypopituitarism                                                                    | 2     |
| <i>PROP1</i>                                                                                                        | AR      | Pituitary can be enlarged                                                                   | 15    |
| <i>ROBO1</i>                                                                                                        | AD      | Pituitary stalk interruption syndrome                                                       | 16    |
| <i>SOX2</i>                                                                                                         | AD      | Hypogonadism, anophthalmia, developmental delay                                             | 17    |
| <i>SOX3dup</i>                                                                                                      | XLR     | Mental retardation                                                                          | 18    |
| <i>SPR</i>                                                                                                          | AR      | Fluctuating movement disorder, cognitive delay, neurologic dysfunction                      | 19    |
| <i>WDR11</i>                                                                                                        | ?       | PSIS (digenic inheritance, <i>PROKR2</i> and <i>WDR11</i> )                                 | 20    |
| <b>Isolated growth hormone deficiency or bioinactivity (secondary IGF-deficiency)</b>                               |         |                                                                                             |       |
| <i>ALMS1</i>                                                                                                        | AR      | Almstrom S.                                                                                 | 21    |
| <i>BTK</i>                                                                                                          | XLR     | Agammaglobulinemia                                                                          | 22    |
| <i>GH1</i>                                                                                                          | AR      | Type IA, complete GHD, growth-attenuating Abs to hGH treatment                              | 23-25 |
| <i>GH1</i>                                                                                                          | AR      | Type IB, less complete GHD                                                                  |       |
| <i>GH1</i>                                                                                                          | AD      | Type II variable height deficit or pituitary size; other pit. Def. develop                  |       |
| <i>GH1</i>                                                                                                          | ?       | Bioinactive but immunoactive GH                                                             |       |
| <i>GHRHR</i>                                                                                                        | AR      | Low but measurable GH peak                                                                  | 26    |
| <i>GHSR</i>                                                                                                         | AR,AD   | Variable serum GH and IGF-I                                                                 | 27    |
| <i>IFT172</i>                                                                                                       | AR      | Functional GHD, retinopathy, metaphyseal dysplasia, hypertension                            | 28    |
| <i>RNPC3</i>                                                                                                        | AR      | Severe GHD, hypoplasia anterior pituitary                                                   | 29    |
| <b>Primary IGF-I deficiency (GH normal/high; IGF-I low)</b>                                                         |         |                                                                                             |       |
| <i>GHR</i>                                                                                                          | AR, AD  | Variable height deficit and GHBP, midfacial hypoplasia                                      | 30    |
| <i>IGF1</i>                                                                                                         | AR, AD  | SGA, microcephaly, deafness; ↑GH and IGFBP-3; IGF-I dependent on assay                      | 31,32 |
| <i>IGFALS</i>                                                                                                       | AR      | Mild height deficit; IGFBP-3 SDS<IGF-I SDS                                                  | 33    |
| <i>IKBKB</i>                                                                                                        | AR, AD  | Immunodeficiency;                                                                           | 34    |
| <i>IL2RG</i>                                                                                                        | XLR     | Non-response to GH injections                                                               | 35    |
| <i>STAT3</i>                                                                                                        | AD(act) | Associated with early-onset multi-organ autoimmune disease                                  | 36    |
| <i>STAT5B</i>                                                                                                       | AR      | Midfacial hypoplasia, immunodeficiency; ↑GH and PRL                                         | 37    |
| <b>(Apparent) IGF-I insensitivity (IGF-I usually &gt;mean for age)</b>                                              |         |                                                                                             |       |
| <i>IGF1R</i>                                                                                                        | AD,AR   | SGA, microcephaly; GH ↑; IGF-I and IGFBP-3 normal                                           | 38    |
| <i>PAPPA2</i>                                                                                                       | AR      | Microcephaly, skeletal abnormalities, ↑GH, IGF-I, IGFBP-3 and ALS                           | 39    |
| <i>IGF2</i>                                                                                                         | impr    | Phenotype resembles SRS                                                                     | 40    |
|                                                                                                                     | Impr    | SRS, severe IUGR, triangular shaped face, broad forehead, asymmetry, minor malformations    | 41,42 |

**Abbreviations:** Abs, antibodies; act, activating; AR, autosomal recessive; AD, autosomal dominant; ALS, acid labile; subunit; IGF, Insulin-like growth factor; IGFBP, IGF binding protein; GH, growth hormone; GHD, growth hormone deficiency; Impr, imprinted; IUGR, intrauterine growth retardation; PRL,

prolactin; PSIS, pituitary stalk interruption syndrome; S, syndrome; SDS, standard deviation score; SRS, Silver-Russell syndrome

- 1 Raivio, T. *et al.* Genetic overlap in Kallmann syndrome, combined pituitary hormone deficiency, and septo-optic dysplasia. *J Clin Endocrinol Metab* **97**, E694-699, doi:10.1210/jc.2011-2938 (2012).
- 2 Correa, F. A. *et al.* FGFR1 and PROKR2 rare variants found in patients with combined pituitary hormone deficiencies. *Endocr. Connect* **4**, 100-107, doi:EC-15-0015 [pii];10.1530/EC-15-0015 [doi] (2015).
- 3 Roessler, E. *et al.* A previously unidentified amino-terminal domain regulates transcriptional activity of wild-type and disease-associated human GLI2. *Hum Mol Genet* **14**, 2181-2188, doi:10.1093/hmg/ddi222 (2005).
- 4 Kang, S., Graham, J. M., Jr., Olney, A. H. & Biesecker, L. G. GLI3 frameshift mutations cause autosomal dominant Pallister-Hall syndrome. *Nat Genet* **15**, 266-268, doi:10.1038/ng0397-266 (1997).
- 5 Karaca, E. *et al.* Whole-exome sequencing identifies homozygous GPR161 mutation in a family with pituitary stalk interruption syndrome. *J Clin Endocrinol Metab* **100**, E140-E147, doi:10.1210/jc.2014-1984 [doi] (2015).
- 6 Dattani, M. T. *et al.* Mutations in the homeobox gene HESX1/Hesx1 associated with septo-optic dysplasia in human and mouse. *Nat Genet* **19**, 125-133, doi:10.1038/477 (1998).
- 7 Gorbenko del, B. D., de Graaff, L. C., Posthouwer, D., Visser, T. J. & Hokken-Koelega, A. C. Isolated GH deficiency: mutation screening and copy number analysis of HMGA2 and CDK6 genes. *Eur. J Endocrinol* **165**, 537-544, doi:EJE-11-0478 [pii];10.1530/EJE-11-0478 [doi] (2011).
- 8 Sun, Y. *et al.* Loss-of-function mutations in IGSF1 cause an X-linked syndrome of central hypothyroidism and testicular enlargement. *Nat. Genet* **44**, 1375-1381, doi:ng.2453 [pii];10.1038/ng.2453 [doi] (2012).
- 9 Netchine, I. *et al.* Mutations in LHX3 result in a new syndrome revealed by combined pituitary hormone deficiency. *Nat Genet* **25**, 182-186, doi:10.1038/76041 (2000).
- 10 Machinis, K. *et al.* Syndromic short stature in patients with a germline mutation in the LIM homeobox LHX4. *Am J Hum Genet* **69**, 961-968 (2001).
- 11 Dateki, S. *et al.* OTX2 mutation in a patient with anophthalmia, short stature, and partial growth hormone deficiency: functional studies using the IRBP, HESX1, and POU1F1 promoters. *J Clin Endocrinol Metab* **93**, 3697-3702, doi:10.1210/jc.2008-0720 (2008).
- 12 Diaczok, D., Romero, C., Zunich, J., Marshall, I. & Radovick, S. A novel dominant negative mutation of OTX2 associated with combined pituitary hormone deficiency. *J Clin Endocrinol Metab* **93**, 4351-4359, doi:10.1210/jc.2008-1189 (2008).
- 13 Semina, E. V. *et al.* Cloning and characterization of a novel bicoid-related homeobox transcription factor gene, RIEG, involved in Rieger syndrome. *Nat Genet* **14**, 392-399, doi:10.1038/ng1296-392 (1996).
- 14 Pfaffle, R. W. *et al.* Mutation of the POU-specific domain of Pit-1 and hypopituitarism without pituitary hypoplasia. *Science* **257**, 1118-1121 (1992).
- 15 Wu, W. *et al.* Mutations in PROP1 cause familial combined pituitary hormone deficiency. *Nat. Genet* **18**, 147-149 (1998).
- 16 Bashamboo, A., Bignon-Topalovic, J., Moussi, N., McElreavey, K. & Brauner, R. Mutations in the Human ROBO1 Gene in Pituitary Stalk Interruption Syndrome. *J Clin Endocrinol Metab* **102**, 2401-2406, doi:10.1210/jc.2016-1095 (2017).
- 17 Kelberman, D. *et al.* Mutations within Sox2/SOX2 are associated with abnormalities in the hypothalamo-pituitary-gonadal axis in mice and humans. *J Clin Invest* **116**, 2442-2455, doi:10.1172/JCI28658 (2006).

- 18 Laumonnier, F. *et al.* Transcription factor SOX3 is involved in X-linked mental retardation with growth hormone deficiency. *Am J Hum Genet* **71**, 1450-1455, doi:10.1086/344661 (2002).
- 19 Zielonka, M. *et al.* Dopamine-Responsive Growth-Hormone Deficiency and Central Hypothyroidism in Sepiapterin Reductase Deficiency. *JIMD Rep* **24**, 109-113, doi:10.1007/8904\_2015\_450 (2015).
- 20 McCormack, S. E. *et al.* Digenic Inheritance of PROKR2 and WDR11 Mutations in Pituitary Stalk Interruption Syndrome. *J Clin Endocrinol Metab* **102**, 2501-2507, doi:10.1210/jc.2017-00332 (2017).
- 21 Romano, S. *et al.* Alstrom syndrome is associated with short stature and reduced GH reserve. *Clin Endocrinol (Oxf)* **79**, 529-536, doi:10.1111/cen.12180 [doi] (2013).
- 22 Vorechovsky, I. *et al.* Mutation pattern in the Bruton's tyrosine kinase gene in 26 unrelated patients with X-linked agammaglobulinemia. *Hum Mutat* **9**, 418-425, doi:10.1002/(SICI)1098-1004(1997)9:5<418::AID-HUMU7>3.0.CO;2-# (1997).
- 23 Braga, S., Phillips, J. A., III, Joss, E., Schwarz, H. & Zuppinger, K. Familial growth hormone deficiency resulting from a 7.6 kb deletion within the growth hormone gene cluster. *Am. J Med. Genet* **25**, 443-452, doi:10.1002/ajmg.1320250306 [doi] (1986).
- 24 Phillips, J. A., III & Cogan, J. D. Genetic basis of endocrine disease. 6. Molecular basis of familial human growth hormone deficiency. *J Clin Endocrinol Metab* **78**, 11-16, doi:10.1210/jcem.78.1.8288694 [doi] (1994).
- 25 Takahashi, Y. *et al.* Brief report: short stature caused by a mutant growth hormone [see comments]. *N. Engl. J. Med* **334**, 432-436 (1996).
- 26 Wajnrajch, M. P., Gertner, J. M., Harbison, M. D., Chua, S. C., Jr. & Leibel, R. L. Nonsense mutation in the human growth hormone-releasing hormone receptor causes growth failure analogous to the little (lit) mouse. *Nat. Genet* **12**, 88-90, doi:10.1038/ng0196-88 [doi] (1996).
- 27 Pantel, J. *et al.* Loss of constitutive activity of the growth hormone secretagogue receptor in familial short stature. *J Clin Invest* **116**, 760-768 (2006).
- 28 Lucas-Herald, A. K. *et al.* A case of functional growth hormone deficiency and early growth retardation in a child with IFT172 mutations. *J Clin Endocrinol Metab* **100**, 1221-1224, doi:10.1210/jc.2014-3852 [doi] (2015).
- 29 Argente, J. *et al.* Defective minor spliceosome mRNA processing results in isolated familial growth hormone deficiency. *EMBO Mol. Med* **6**, 299-306, doi:emmm.201303573 [pii];10.1002/emmm.201303573 [doi] (2014).
- 30 Amselem, S. *et al.* Laron dwarfism and mutations of the growth hormone-receptor gene. *N. Engl. J Med* **321**, 989-995, doi:10.1056/NEJM198910123211501 [doi] (1989).
- 31 Woods, K. A., Camacho-Hubner, C., Savage, M. O. & Clark, A. J. Intrauterine growth retardation and postnatal growth failure associated with deletion of the insulin-like growth factor I gene. *N. Engl. J Med* **335**, 1363-1367 (1996).
- 32 Walenkamp, M. J. *et al.* Homozygous and heterozygous expression of a novel insulin-like growth factor-I mutation. *J Clin Endocrinol Metab* **90**, 2855-2864 (2005).
- 33 Domene, H. M. *et al.* Deficiency of the circulating insulin-like growth factor system associated with inactivation of the acid-labile subunit gene. *New England Journal of Medicine* **350**, 570-577 (2004).
- 34 Wu, S. *et al.* Growth hormone and insulin-like growth factor I insensitivity of fibroblasts isolated from a patient with an I{kappa}B{alpha} mutation. *J Clin Endocrinol Metab* **95**, 1220-1228 (2010).
- 35 Ursini, M. V. *et al.* Atypical X-linked SCID phenotype associated with growth hormone hyporesponsiveness. *Clin Exp. Immunol* **129**, 502-509, doi:1823 [pii] (2002).
- 36 Flanagan, S. E. *et al.* Activating germline mutations in STAT3 cause early-onset multi-organ autoimmune disease. *Nat. Genet* **46**, 812-814, doi:ng.3040 [pii];10.1038/ng.3040 [doi] (2014).
- 37 Kofoed, E. M. *et al.* Growth hormone insensitivity associated with a STAT5b mutation. *N. Engl. J Med* **349**, 1139-1147 (2003).

- 38 Abuzzahab, M. J. *et al.* IGF-I receptor mutations resulting in intrauterine and postnatal growth retardation. *N. Engl. J Med* **349**, 2211-2222 (2003).
- 39 Dauber, A. *et al.* Mutations in pregnancy-associated plasma protein A2 cause short stature due to low IGF-I availability. *EMBO Mol Med* **8**, 363-374, doi:10.15252/emmm.201506106 (2016).
- 40 Begemann, M. *et al.* Paternally Inherited IGF2 Mutation and Growth Restriction. *N. Engl. J Med*, doi:10.1056/NEJMoa1415227 [doi] (2015).
- 41 Binder, G. *et al.* The endocrine phenotype in silver-russell syndrome is defined by the underlying epigenetic alteration. *J Clin Endocrinol Metab* **93**, 1402-1407, doi:10.1210/jc.2007-1897 [pii];10.1210/jc.2007-1897 [doi] (2008).
- 42 Netchine, I. *et al.* 11p15 imprinting center region 1 loss of methylation is a common and specific cause of typical Russell-Silver syndrome: clinical scoring system and epigenetic-phenotypic correlations. *J Clin Endocrinol Metab* **92**, 3148-3154 (2007).
