# Supplementary material for: Growth hormone — past, present and future
Source: Springer Nature journal article supplement (doi:10.1038/nrendo.2018.22), 2018-03-16
Supplement: 41574_2018_BFnrendo201822_MOESM38_ESM.pdf [file 41574_2018_BFnrendo201822_MOESM38_ESM.pdf]

## Supplementary Box S2. Non-GH deficient medical conditions accepted as indications for GH treatment

**Chronic Renal Insufficiency (CRI)** is associated with growth failure in many children with chronic kidney disease. Its pathophysiology is multifactorial but includes a secondary disturbance of the GH-IGF system<sup>1</sup>. GH only partly increases linear growth<sup>2</sup>.

**Turner Syndrome (TS)** presents in females only and is caused by missing one X-chromosome or part of it. It is characterized by dysmorphic features, hypogonadism and severe short stature<sup>3</sup>. Shortness is predominantly caused by the loss of *SHOX* (located on the pseudo-autosomal region on the X- and Y chromosomes) and not associated with a disorder of the GH-IGF axis. GH treatment has become part of standard care in TS<sup>3,4</sup>.

**Prader-Willi Syndrome (PWS)** is characterized by muscle hypotonia and failure to thrive in infancy followed by hyperphagia with massive overweight, short stature, and intellectual and behavioural deficits<sup>5</sup>. It is mostly caused by the loss of the paternal chromosomal region 15q11.2–q13 or a maternal UPD of the region<sup>6</sup>. The impairment of GH secretion is often combined with other hypothalamo-pituitary deficits. Treatment with rhGH is aiming foremost at improving body composition and metabolism. Height can be completely normalized and other positive effects of GH are maintained by treatment into adult life<sup>7</sup>.

**Small-for-gestational age (SGA)** is defined by a low birth weight and/or length (<2 SDS in endocrine literature) but is also used for children born SGA who remain short in childhood. In these non-syndromic children the GH-IGF system is mostly unaffected, although subtle defects of the GH-IGF axis<sup>8</sup> and various genetic anomalies<sup>9</sup> have been discovered. In most countries rhGH is approved for short children born SGA, including children with Silver-Russell syndrome (SRS)<sup>10</sup> and also long-term efficacy has been shown<sup>11,12</sup>.

**Idiopathic Short Stature (ISS)** is a descriptive term for children who are short for age, sex and the corresponding population, without evidence of a systemic disease, nutritional, psychological or chromosomal disorder, or overt hormonal abnormalities<sup>13</sup>. After the results became available of a placebo-controlled trial<sup>14</sup> and dose-response study<sup>15</sup> ISS was accepted as an indication by FDA in the USA<sup>16</sup>, but the effect on adult height appears modest<sup>17,18</sup>.

**Short stature homeobox-containing gene (*SHOX*)** is a gene located on the short arm of both sex chromosomes which escapes X inactivation. *SHOX* haploinsufficiency causes short stature with a wide range of clinical presentations, varying from severe mesomelic short stature by homozygous mutations (Langer syndrome) via a mesomelic skeletal dysplasia often associated with Madelung deformity (Léri-Weill dyschondrosteosis) to an almost normal clinical presentation (apparent ISS). Besides mutations and deletions of *SHOX* itself, deletions of the 5' and 3' enhancer regions and even some duplications of *SHOX* and its enhancers can cause the phenotype<sup>19</sup>. Short stature is probably due to lack of proper control of chondrocyte apoptosis via the FGF pathway<sup>20</sup>. Both short- and long term responses to rhGH are similar to those observed in Turner syndrome<sup>21</sup>.

**Noonan Syndrome (NS)** is a disorder primarily defined by its phenotype (TS-like, short stature and cardiac anomalies, e.g. pulmonary stenosis)<sup>22</sup>. In 40% of the individuals a defect in *PTPN11* results in

constitutional activation of a phosphatase (protein tyrosine phosphatase SHP-2), thus reducing the generation of IGF-I<sup>23</sup>. GH has been proven to be effective<sup>24</sup> and was approved by the FDA.

In children with **Short bowel syndrome** rhGH in conjunction with nutritional treatment has been proven to improve the condition (weight, growth, fluid loss), which led to an FDA approved indication<sup>25,26</sup>

**Wasting** and cachexia in HIV infected individuals was improved by rhGH due to its anabolic effect, and was approved by FDA and EMA<sup>27,28</sup>.

**Abbreviations in S2:** UPD, uniparental disomy; rhGH, recombinant human growth hormone; EMA, European Medicines Agency; FDA, Federal Drug Administration; FGF, fibroblast growth factor; HIV, human immunodeficiency virus

- 1 Tonshoff, B., Blum, W. F. & Mehls, O. Insulin-like growth factors (IGF) and IGF binding proteins in children with chronic renal failure. *Prog Growth Factor Res* **6**, 481-491 (1995).
- 2 Hodson, E. M., Willis, N. S. & Craig, J. C. Growth hormone for children with chronic kidney disease. *Cochrane Database Syst Rev*, CD003264, doi:10.1002/14651858.CD003264.pub3 (2012).
- 3 Gravholt, C. H. *et al.* Clinical practice guidelines for the care of girls and women with Turner syndrome: proceedings from the 2016 Cincinnati International Turner Syndrome Meeting. *Eur J Endocrinol* **177**, G1-G70, doi:10.1530/EJE-17-0430 (2017).
- 4 Baxter, L., Bryant, J., Cave, C. B. & Milne, R. Recombinant growth hormone for children and adolescents with Turner syndrome. *Cochrane Database Syst Rev*, CD003887, doi:10.1002/14651858.CD003887.pub2 (2007).
- 5 Cassidy, S. B., Schwartz, S., Miller, J. L. & Driscoll, D. J. Prader-Willi syndrome. *Genet Med* **14**, 10-26, doi:10.1038/gim.0b013e31822bead0 (2012).
- 6 Butler, M. G. Prader-Willi Syndrome: Obesity due to Genomic Imprinting. *Curr Genomics* **12**, 204-215, doi:10.2174/138920211795677877 (2011).
- 7 Deal, C. L. *et al.* GrowthHormone Research Society workshop summary: consensus guidelines for recombinant human growth hormone therapy in Prader-Willi syndrome. *J Clin Endocrinol Metab* **98**, E1072-1087, doi:10.1210/jc.2012-3888 (2013).
- 8 de Waal, W. J., Hokken Koelega, A. C., Stijnen, T., de Muinck Keizer Schrama, S. M. & Drop, S. L. Endogenous and stimulated GH secretion, urinary GH excretion, and plasma IGF-I and IGF-II levels in prepubertal children with short stature after intrauterine growth retardation. The Dutch Working Group on Growth Hormone. *Clin. Endocrinol. Oxf* **41**, 621-630 (1994).
- 9 Wit, J. M. *et al.* MECHANISMS IN ENDOCRINOLOGY: Novel genetic causes of short stature. *Eur J Endocrinol* **174**, R145-173, doi:10.1530/EJE-15-0937 (2016).
- 10 Lee, P. A., Chernausek, S. D., Hokken-Koelega, A. C. & Czernichow, P. International Small for Gestational Age Advisory Board consensus development conference statement: management of short children born small for gestational age, April 24-October 1, 2001. *Pediatrics* **111**, 1253-1261 (2003).
- 11 Ranke, M. B. & Lindberg, A. Height at start, first-year growth response and cause of shortness at birth are major determinants of adult height outcomes of short children born small for gestational age and Silver-Russell syndrome treated with growth hormone: analysis of data from KIGS. *Horm Res Paediatr* **74**, 259-266, doi:000289570 [pii];10.1159/000289570 [doi] (2010).

- 12 Maiorana, A. & Cianfarani, S. Impact of growth hormone therapy on adult height of children born small for gestational age. *Pediatrics* **124**, e519-531, doi:10.1542/peds.2009-0293 (2009).
- 13 Wit, J. M. *et al.* Idiopathic short stature: definition, epidemiology, and diagnostic evaluation. *Growth Horm IGF Res* **18**, 89-110 (2008).
- 14 Leschek, E. W. *et al.* Effect of growth hormone treatment on adult height in peripubertal children with idiopathic short stature: a randomized, double-blind, placebo-controlled trial. *J Clin Endocrinol Metab* **89**, 3140-3148 (2004).
- 15 Wit, J. M. *et al.* Growth hormone (GH) treatment to final height in children with idiopathic short stature: evidence for a dose effect. *J Pediatr* **146**, 45-53 (2005).
- 16 Cohen, P. *et al.* Consensus statement on the diagnosis and treatment of children with idiopathic short stature: a summary of the Growth Hormone Research Society, the Lawson Wilkins Pediatric Endocrine Society, and the European Society for Paediatric Endocrinology Workshop. *J Clin Endocrinol Metab* **93**, 4210-4217 (2008).
- 17 Deodati, A. & Cianfarani, S. Impact of growth hormone therapy on adult height of children with idiopathic short stature: systematic review. *BMJ* **342**, c7157 (2011).
- 18 Ranke, M. B. Treatment of children and adolescents with idiopathic short stature. *Nat. Rev Endocrinol* **9**, 325-334, doi:nrendo.2013.71 [pii];10.1038/nrendo.2013.71 [doi] (2013).
- 19 Benito-Sanz, S. *et al.* A novel class of Pseudoautosomal region 1 deletions downstream of SHOX is associated with Leri-Weill dyschondrosteosis. *Am. J Hum. Genet* **77**, 533-544, doi:S0002-9297(07)61002-7 [pii];10.1086/449313 [doi] (2005).
- 20 Fukami, M., Seki, A. & Ogata, T. SHOX Haploinsufficiency as a Cause of Syndromic and Nonsyndromic Short Stature. *Mol Syndromol* **7**, 3-11, doi:10.1159/000444596 (2016).
- 21 Blum, W. F. *et al.* GH treatment to final height produces similar height gains in patients with SHOX deficiency and Turner syndrome: results of a multicenter trial. *J Clin Endocrinol Metab* **98**, E1383-1392, doi:10.1210/jc.2013-1222 (2013).
- 22 Roberts, A. E., Allanson, J. E., Tartaglia, M. & Gelb, B. D. Noonan syndrome. *Lancet* **381**, 333-342, doi:S0140-6736(12)61023-X [pii];10.1016/S0140-6736(12)61023-X [doi] (2013).
- 23 Tartaglia, M. *et al.* PTPN11 mutations in Noonan syndrome: molecular spectrum, genotype-phenotype correlation, and phenotypic heterogeneity. *Am J Hum Genet* **70**, 1555-1563, doi:10.1086/340847 (2002).
- 24 Noonan, J. A. & Kappelgaard, A. M. The efficacy and safety of growth hormone therapy in children with noonan syndrome: a review of the evidence. *Horm Res Paediatr* **83**, 157-166, doi:10.1159/000369012 (2015).
- 25 Byrne, T. A. *et al.* Growth hormone, glutamine, and an optimal diet reduces parenteral nutrition in patients with short bowel syndrome: a prospective, randomized, placebo-controlled, double-blind clinical trial. *Ann Surg* **242**, 655-661 (2005).
- 26 Guyda, H. J. Four decades of growth hormone therapy for short children: what have we achieved? *J Clin Endocrinol Metab* **84**, 4307-4316 (1999).
- 27 Mulligan, K., Grunfeld, C., Hellerstein, M. K., Neese, R. A. & Schambelan, M. Anabolic effects of recombinant human growth hormone in patients with wasting associated with human immunodeficiency virus infection. *J Clin Endocrinol Metab* **77**, 956-962, doi:10.1210/jcem.77.4.8408471 (1993).
- 28 Moyle, G. J. *et al.* Efficacy of selected treatments of HIV wasting: a systematic review and meta-analysis. *J Acquir Immune Defic Syndr* **37 Suppl 5**, S262-276 (2004).
